# Supplementary material
Source: Research Square preprint supplement (doi:10.21203/rs.3.rs-9076185/v1)
Supplement: Supplementary file 1 [file e535e55d5304d6d63952f36a.docx]

**Supplemental**

*Table S1: Annual Personnel Cost per person by Scenario, Method and UNPD Region*

| **Region** | **Scenario** | **Pill** | **ECP** | **Condom** | **Female condom** | **Injectables** | **Implants** | **IUDs** |
| --- | --- | --- | --- | --- | --- | --- | --- | --- |
| **Africa** | *Status-quo* | $14.91 | $5.35 | $10.00 | $9.10 | $11.61 | $3.55 | $6.53 |
| *Task-sharing* | $8.39 | $3.27 | $5.63 | $5.12 | $6.53 | $2.77 | $4.34 |
| **Asia** | *Status-quo* | $6.93 | $8.60 | $8.13 | $6.07 | $6.65 | $3.47 | $2.77 |
| *Task-sharing* | $3.90 | $5.26 | $4.57 | $3.42 | $3.74 | $2.71 | $1.85 |
| **Europe** | *Status-quo* | $14.46 | $6.09 | $13.04 | $12.66 | $12.71 | $8.96 | $4.12 |
| *Task-sharing* | $8.14 | $3.72 | $7.34 | $7.12 | $7.15 | $7.00 | $2.74 |
| **Latin America & the Caribbean** | *Status-quo* | $17.47 | $13.51 | $14.50 | $19.68 | $18.50 | $8.81 | $4.64 |
| *Task-sharing* | $9.83 | $8.26 | $8.16 | $11.08 | $10.41 | $6.89 | $3.09 |
| **Oceania** | *Status-quo* | $8.09 | N/A* | $7.32 | $6.95 | $8.61 | $3.37 | $2.38 |
| *Task-sharing* | $4.55 | N/A* | $4.12 | $3.91 | $4.85 | $2.63 | $1.59 |
| **LMICs** | *Status-quo* | $10.84 | $7.29 | $9.07 | $9.91 | $10.54 | $4.18 | $3.18 |
| *Task-sharing* | $6.10 | $4.46 | $5.10 | $5.58 | $5.93 | $3.27 | $2.12 |
| ***Cost Savings***** | **44%** | **39%** | **44%** | **44%** | **44%** | **22%** | **33%** |

* No data available on use of emergency contraceptive pills (ECPs) for LMICs in Oceania.

** Personnel cost savings per person by method are estimated to be the same across all regions and at all LMICs level.

*Table S2: Annual Direct Cost per person by Scenario, Method and UNPD Region*

| **Region** | **Scenario** | **Pill** | **ECP** | **Condom** | **Female condom** | **Injectables** | **Implants** | **IUDs** |
| --- | --- | --- | --- | --- | --- | --- | --- | --- |
| **Africa** | *Status-quo* | $19.21 | $11.34 | $12.50 | $46.92 | $15.83 | $6.89 | $6.98 |
| *Task-sharing* | $12.70 | $9.26 | $8.13 | $42.94 | $10.76 | $6.12 | $4.80 |
| ***Cost Savings*** | **34%** | **18%** | **35%** | **8%** | **32%** | **11%** | **31%** |
| **Asia** | *Status-quo* | $11.09 | $14.22 | $10.63 | $42.36 | $10.46 | $6.70 | $3.19 |
| *Task-sharing* | $8.06 | $10.88 | $7.07 | $39.71 | $7.55 | $5.94 | $2.26 |
| ***Cost Savings*** | **27%** | **23%** | **33%** | **6%** | **28%** | **11%** | **29%** |
| **Europe** | *Status-quo* | $21.95 | $14.35 | $15.55 | $48.97 | $19.10 | $12.47 | $4.54 |
| *Task-sharing* | $15.63 | $11.98 | $9.85 | $43.43 | $13.55 | $10.51 | $3.16 |
| ***Cost Savings*** | **29%** | **16%** | **37%** | **11%** | **29%** | **16%** | **30%** |
| **Latin America & the Caribbean** | *Status-quo* | $24.11 | $21.27 | $17.01 | $56.64 | $25.91 | $12.24 | $5.06 |
| *Task-sharing* | $16.47 | $16.02 | $10.67 | $48.03 | $17.82 | $10.32 | $3.51 |
| ***Cost Savings*** | **32%** | **25%** | **37%** | **15%** | **31%** | **16%** | **31%** |
| **Oceania** | *Status-quo* | $13.47 | N/A* | $9.83 | $45.60 | $12.46 | $6.11 | $2.80 |
| *Task-sharing* | $9.93 | N/A* | $6.63 | $42.56 | $8.70 | $5.37 | $2.00 |
| ***Cost Savings*** | **26%** | **N/A*** | **33%** | **7%** | **30%** | **12%** | **28%** |
| **LMICs** | *Status-quo* | $15.59 | $13.26 | $11.57 | $46.96 | $15.10 | $7.50 | $3.60 |
| *Task-sharing* | $10.85 | $10.42 | $7.60 | $42.63 | $10.49 | $6.59 | $2.54 |
| ***Cost Savings*** | **30%** | **21%** | **34%** | **9%** | **31%** | **12%** | **30%** |

*Table S3. Estimated number of Modern Method Users (in thousands) and method mix, by UNPD Subregion.*

| **Region** | **Subregion** | **Total users** | | **Pill** | **ECP** | **Condom** | **Female condom** | **Injectables** | **Implants** | **IUDs** |
| --- | --- | --- | --- | --- | --- | --- | --- | --- | --- | --- |
| **Africa** | **Eastern Africa** | | 38,213 | 15% | 1% | 8% | 0.1% | 41% | 30% | 4% |
| **Middle Africa** | | 7,966 | 20% | 1% | 43% | 2% | 20% | 12% | 2% |
| **Northern Africa** | | 20,637 | 49% | 0.03% | 4% | 0.04% | 10% | 1% | 36% |
| **Southern Africa** | | 10,249 | 12% | 0.1% | 28% | 1% | 50% | 7% | 2% |
| **Western Africa** | | 19,669 | 18% | 0.4% | 16% | 1% | 31% | 29% | 5% |
| **Asia** | **Eastern Asia** | | 209,890 | 4% | 0.2% | 45% | 0.05% | 0.4% | 1% | 50% |
| **Central Asia** | | 7,627 | 7% | 0.01% | 14% | 0.1% | 2% | 0.04% | 77% |
| **Southern Asia** | | 222,078 | 35% | 0.2% | 42% | 0.1% | 11% | 2% | 10% |
| **Southeast Asia** | | 63,541 | 33% | 0.02% | 10% | 0.3% | 35% | 6% | 15% |
| **Western Asia** | | 16,122 | 28% | 0.03% | 27% | 0.1% | 6% | 1% | 38% |
| **Europe** | **Eastern Europe** | | 5,014 | 13% | N/A* | 59% | 1% | 0% | 0% | 27% |
| **Southern Europe** | | 795 | 15% | 0.1% | 72% | 1% | 1% | 0% | 11% |
| **Latin America & the Caribbean** | **Caribbean** | | 4,196 | 25% | N/A* | 24% | 0.3% | 26% | 5% | 19% |
| **Central America** | | 23,917 | 13% | 0.1% | 28% | 0.2% | 21% | 11% | 27% |
| **South America** | | 63,011 | 44% | 0.2% | 26% | 0.3% | 18% | 4% | 7% |
| **Oceania** | **Oceania** | | 789 | 12% | N/A* | 5% | 1% | 40% | 38% | 4% |

*No data available on use of emergency contraceptive pills (ECPs) for LMICs in Oceania.

*Table S4: Total direct Cost Comparison between Status quo and Task-sharing scenarios (USD, millions) and Relative Cost Savings (%) by Method and UNPD Region.*

| **Region** | **Scenario** | **Pill** | **ECP** | **Condom** | **Female condom** | **Injectables** | **Implants** | **IUDs** |
| --- | --- | --- | --- | --- | --- | --- | --- | --- |
| **Africa** | *Status-quo* | $401 | $6.9 | $153 | $19 | $449 | $122 | $67 |
| *Task-sharing* | $265 | $5.6 | $99 | $18 | $305 | $109 | $46 |
| ***Cost Savings*** | **34%** | **18%** | **35%** | **8%** | **32%** | **11%** | **31%** |
| **Asia** | *Status-quo* | $674 | $7.1 | $1,267 | $16 | $323 | $39 | $342 |
| *Task-sharing* | $490 | $5.4 | $843 | $15 | $233 | $35 | $242 |
| ***Cost Savings*** | **27%** | **23%** | **33%** | **6%** | **28%** | **11%** | **29%** |
| **Europe** | *Status-quo* | $16 | $0.01 | $51 | $1.8 | $0.2 | $0.2 | $6.1 |
| *Task-sharing* | $11 | $0.01 | $32 | $1.6 | $0.1 | $0.1 | $4.2 |
| ***Cost Savings*** | **29%** | **16%** | **37%** | **11%** | **29%** | **16%** | **30%** |
| **Latin America & the Caribbean** | *Status-quo* | $545 | $1.8 | $275 | $9.7 | $295 | $41 | $36 |
| *Task-sharing* | $372 | $1.4 | $172 | $8.2 | $203 | $34 | $25 |
| ***Cost Savings*** | **32%** | **25%** | **37%** | **15%** | **31%** | **16%** | **31%** |
| **Oceania** | *Status-quo* | $0.9 | N/A* | $0.3 | $0.3 | $2.8 | $1.3 | $0.1 |
| *Task-sharing* | $0.6 | N/A* | $0.2 | $0.3 | $1.9 | $1.1 | $0.05 |
| ***Cost Savings*** | **26%** | **N/A*** | **33%** | **7%** | **30%** | **12%** | **28%** |
| **LMICs** | *Status-quo* | $1,637 | $16 | $1,746 | $47 | $1,069 | $204 | $451 |
| *Task-sharing* | $1,139 | $12 | $1,147 | $43 | $742 | $179 | $318 |
| ***Cost Savings*** | **30%** | **21%** | **34%** | **9%** | **31%** | **12%** | **30%** |

*Table S5. Total direct absolute cost savings (USD, millions) and method distribution of absolute cost savings by subregion.*

| **Region** | **Subregion** | **Total absolute cost savings** | | **Pill** | **ECP** | **Condom** | **Female condom** | **Injectables** | **Implants** | **IUDs** |
| --- | --- | --- | --- | --- | --- | --- | --- | --- | --- | --- |
| **Africa** | **Eastern Africa** | | 69 | 21% | 1.3% | 9% | 0.2% | 57% | 10% | 1% |
| **Middle Africa** | | 27 | 24% | 0.5% | 44% | 1.4% | 27% | 3% | 0% |
| **Northern Africa** | | 154 | 62% | 0.1% | 5% | 0.1% | 20% | 1% | 12% |
| **Southern Africa** | | 73 | 11% | 0.1% | 25% | 0.4% | 61% | 2% | 0% |
| **Western Africa** | | 48 | 23% | 0.2% | 20% | 1.5% | 46% | 8% | 1% |
| **Asia** | **Eastern Asia** | | 386 | 8% | 0.3% | 72% | 0.1% | 1% | 0% | 19% |
| **Central Asia** | | 15 | 21% | 0.0% | 38% | 0.1% | 4% | 0% | 37% |
| **Southern Asia** | | 229 | 35% | 0.2% | 46% | 0.1% | 16% | 1% | 3% |
| **Southeast Asia** | | 108 | 41% | 0.03% | 13% | 0.4% | 40% | 2% | 5% |
| **Western Asia** | | 65 | 42% | 0.04% | 35% | 0.1% | 10% | 0% | 13% |
| **Europe** | **Eastern Europe** | | 23 | 18% | N/A* | 73% | 0.8% | 0% | 0% | 8% |
| **Southern Europe** | | 2.4 | 17% | 0.1% | 79% | 0.5% | 1% | 0% | 3% |
| **Latin America & the Caribbean** | **Caribbean** | | 12 | 33% | N/A* | 29% | 0.4% | 29% | 2% | 7% |
| **Central America** | | 46 | 16% | 0.1% | 39% | 0.3% | 30% | 5% | 10% |
| **South America** | | 329 | 49% | 0.1% | 25% | 0.4% | 23% | 1% | 2% |
| **Oceania** | **Oceania** | | 1.3 | 17% | N/A* | 6% | 1.5% | 63% | 11% | 1% |

*No data available on use of emergency contraceptive pills (ECPs) for LMICs in Oceania.

*Table S6. Total direct relative cost savings (%) by method and subregion.*

| **Region** | **Subregion** | **Subregion, overall** | | **Pill** | **ECP** | **Condom** | **Female condom** | **Injectables** | **Implants** | **IUDs** |
| --- | --- | --- | --- | --- | --- | --- | --- | --- | --- | --- |
| **Africa** | **Eastern Africa** | | 23% | 26% | 18% | 29% | 6% | 27% | 10% | 26% |
| **Middle Africa** | | 30% | 32% | 20% | 34% | 7% | 33% | 12% | 28% |
| **Northern Africa** | | 36% | 37% | 32% | 39% | 18% | 39% | 18% | 32% |
| **Southern Africa** | | 34% | 32% | 31% | 38% | 12% | 35% | 16% | 31% |
| **Western Africa** | | 25% | 28% | 13% | 32% | 8% | 29% | 11% | 27% |
| **Asia** | **Eastern Asia** | | 32% | 23% | 26% | 34% | 6% | 33% | 14% | 29% |
| **Central Asia** | | 32% | 33% | 21% | 37% | 10% | 25% | 11% | 29% |
| **Southern Asia** | | 29% | 27% | 20% | 32% | 6% | 30% | 12% | 28% |
| **Southeast Asia** | | 25% | 27% | 18% | 31% | 6% | 25% | 10% | 27% |
| **Western Asia** | | 34% | 34% | 28% | 37% | 10% | 36% | 16% | 31% |
| **Europe** | **Eastern Europe** | | 34% | 29% | N/A* | 37% | 12% | 37% | 16% | 30% |
| **Southern Europe** | | 32% | 32% | 16% | 33% | 7% | 23% | 12% | 28% |
| **Latin America & the Caribbean** | **Caribbean** | | 32% | 33% | N/A* | 36% | 11% | 32% | 14% | 30% |
| **Central America** | | 31% | 29% | 23% | 36% | 12% | 31% | 15% | 30% |
| **South America** | | 32% | 32% | 25% | 38% | 16% | 31% | 16% | 31% |
| **Oceania** | **Oceania** | | 24% | 26% | N/A* | 33% | 7% | 30% | 12% | 28% |

*No data available on use of emergency contraceptive pills (ECPs) for LMICs in Oceania.
